# Supplementary material for: Daniel y el miedo escénico
Source: Royal Society of Chemistry journal article supplement (doi:10.1039/d3cc05844a), 2010-01-01
Supplement: d3cc05844a1.pdf [file d3cc05844a1.pdf]

## Supporting Information

Carbonyl-Linked Cobalt Polyphthalocyanines as High-Selectivity Catalyst for Electrochemical CO<sub>2</sub> Reduction

*Haisen Jin*<sup>‡<sup>a,b</sup></sup>, *Yajing Di*<sup>‡<sup>a,b</sup></sup>, *Yueang Gu*<sup>a,b</sup>, *Yu Chen*<sup>a,b</sup>, *Meiling Dou*<sup>a,b</sup>, *Zhengping Zhang*<sup>\*</sup>  
*<sup>a,b</sup>*, *Feng Wang*<sup>\*<sup>a,b</sup></sup>

a State Key Laboratory of Chemical Resource Engineering, Beijing Key Laboratory of Electrochemical Process and Technology for Materials, Beijing University of Chemical Technology, Beijing 100029, P R China.

b Beijing Advanced Innovation Center for Soft Matter Science and Engineering, Beijing University of Chemical Technology, Beijing 100029, P. R. China.

\* Corresponding email: [zhangzhengping@mail.buct.edu.cn](mailto:zhangzhengping@mail.buct.edu.cn) (Z. Zhang);

[wangf@mail.buct.edu.cn](mailto:wangf@mail.buct.edu.cn) (F. Wang)

‡ These authors contributed equally to this work.

---

## Chemicals.

Cobalt chloride hexahydrate [CoCl<sub>2</sub>·6H<sub>2</sub>O, Aladdin, CAS#: 7791-13-1], phthalic anhydride (PA) [C<sub>8</sub>H<sub>4</sub>O<sub>3</sub>, Sinopharm, CAS#: 85-44-9], pyromellitic dianhydride (PMDA) [C<sub>10</sub>H<sub>2</sub>O<sub>6</sub>, Aladdin, CAS#: 89-32-7], 3,3',4,4'-benzophenonetetracarboxylicdianhydride (BTDA) [C<sub>17</sub>H<sub>6</sub>O<sub>7</sub>, Sinopharm, CAS#: 2421-28-5], urea [(NH<sub>2</sub>)<sub>2</sub>CO, Aladdin, CAS#: 57-13-6], ammonium chloride [NH<sub>4</sub>Cl, Aladdin, CAS#: 12125-02-9], ammonium molybdate tetrahydrate [(NH<sub>4</sub>)<sub>6</sub>Mo<sub>7</sub>O<sub>24</sub>·4H<sub>2</sub>O, Sinopharm, CAS#: 12054-85-2], potassium bicarbonate [KHCO<sub>3</sub>, Aladdin, CAS#: 298-14-6], and Nafion [5%, DuPont] were used without further purification. High purity carbon dioxide and nitrogen gas were bought from Beijing AP BAIF Gases Industry Co. Ltd.

## Preparations

The carbonyl-linked cobalt polyphthalocyanines (CL-CoPPc) were prepared by a solid phase synthesis method in a muffle furnace. 3,3',4,4'-benzophenonetetracarboxylicdianhydride (BTDA) (0.155 g), CoCl<sub>2</sub>·6H<sub>2</sub>O (0.08 g), urea (0.3 g), NH<sub>4</sub>Cl (0.045 g), and (NH<sub>4</sub>)<sub>6</sub>Mo<sub>7</sub>O<sub>24</sub>·4H<sub>2</sub>O (0.015 g) were ground together, and then transferred into a 50 mL crucible. The mixture was heated at 140 °C for 1 hour, and subsequently heated up to 240 °C for another 3 hours. After cooling to room temperature, the obtained solid was washed with water, acetone, and ethanol. The final product was dried under vacuum at 80 °C for 24 hours. The cobalt polyphthalocyanines (CoPPc) and cobalt phthalocyanine (CoPc) were synthesized in the similar route by using pyromellitic dianhydride (0.105 g) and phthalic anhydride (0.143

---

g) to replace 3,3',4,4'-benzophenonetetracarboxylic dianhydride, respectively.

The preparation of CL-CoPPc/CNT was similar to the synthesis of CL-CoPPc.  $\text{CoCl}_2 \cdot 6\text{H}_2\text{O}$  (0.08 g), deionized water (5 mL) and a certain amount of purified MWCNTs were mixed and adequately stirred, then dried under vacuum at 80 °C overnight. After completely drying, the premixed material, BTDA (0.155 g), urea (0.3 g),  $\text{NH}_4\text{Cl}$  (0.045 g) and  $(\text{NH}_4)_6\text{Mo}_7\text{O}_{24} \cdot 4\text{H}_2\text{O}$  (0.015 g) were ground together, and then transferred into a 50 mL crucible. The mixture was heated at 140 °C for 1 hour, and subsequently heated up to 240 °C for another 3 hours. After cooling to room temperature, the obtained solid was washed with water, acetone, and ethanol. The final product was dried under vacuum at 80 °C for 24 hours. Depending on the amount of MWCNTs (1.262 g, 0.56 g, 0.327 g, 0.21 g), CL-CoPPc/CNT with phthalocyanine content of 10 wt%, 20 wt%, 30 wt% and 40 wt% were obtained respectively. CNT-supported cobalt phthalocyanine (CoPc/CNT) and CNT-supported cobalt polyphthalocyanine (CoPPc/CNT) were synthesized in the similar route by using pyromellitic dianhydride (0.105 g) and phthalic anhydride (0.143 g) to replace BTDA, respectively.

## **Characterization**

Field-emission scanning electron microscopy (FE-SEM, JSM-6701/JEOL), transmission electron microscopy (TEM, JEOL JEM-2100) and aberration-corrected scanning transmission electron microscope (STEM, JEMARM200F/JEOL) equipped with a spherical aberration corrector were used to observe the morphologic and structural characteristics of the samples. The Fourier Transform InfraRed (FT-IR) analysis was performed on a Nicolet 8700/Continuum

---

XL with wavenumber from 2300 to 500  $\text{cm}^{-1}$ . The ultraviolet-visible (UV-vis) absorption spectroscopy was carried out on a Shimadzu UV-2450 with wavelength from 300 to 900 nm. Raman spectra were recorded on a Horiba Jobin Yvon LabRam HR800 with an excitation wavelength of 633 nm. Solid-state nuclear magnetic resonance (NMR) spectra were measured on a Bruker AVANCE III 600M spectrometer operating at 75.5 MHz for  $^{13}\text{C}$ . The X-ray diffraction profile (XRD) was obtained on a Rigaku D/Max 2500 VB2+/PC diffractometer with Cu K $\alpha$  radiation ( $\lambda=1.54056 \text{ \AA}$ ) as the X-ray source. The elemental oxidation states of the samples were investigated by X-ray photoelectron spectrum (XPS, Thermo Fisher Scientific ESCALAB 250). The elemental spectra were all corrected with respect to C1s peaks at 284.6 eV. The thermogravimetric analysis (TGA) was obtained on a Rigaku TG-8120 with under the atmosphere of air at a heating rate of 5  $\text{K min}^{-1}$ .

### **Electrode preparation and electrochemical measurements**

The catalyst ink in H-cell was prepared as follows. 4 mg of catalyst and 20  $\mu\text{L}$  of 5 wt% Nafion solution were dispersed in 2 ml ethanol assisted with ultrasonication for 0.5 h. Then 10  $\mu\text{L}$  catalyst ink was drop cast onto glassy carbon electrode (composite catalyst loading: 0.16  $\text{mg cm}^{-2}$ ) as the working electrode. The electrochemistry tests were carried out in a two-compartment electrochemical cell (Scheme S1) with a three-electrode system. The saturated Ag/AgCl electrode was the reference electrode, while a Pt gauze was used as the counter electrode. The electrolyte was saturated with either  $\text{CO}_2$  or  $\text{N}_2$ . Electrocatalytic reduction of  $\text{CO}_2$  was carried out in  $\text{CO}_2$ -saturated 0.5 M  $\text{KHCO}_3$  solution (pH 7.2) at room temperature and

---

under atmospheric pressure. During the ECR measurements, the electrolyte in the cathodic compartment was stirred at a speed of 400 rpm. All potentials were converted to RHE scale based on the Nernst equation.

For the ECR measurements based on GDE, 25 mg of composite catalyst and 55  $\mu\text{L}$  of 5 wt% Nafion solution were dispersed in 10 mL ethanol, then the mixture was vigorously sonicated for 30 min to form a uniform ink. The ink was sprayed onto a  $2 \times 2 \text{ cm}^2$  carbon fiber paper (SGL28BC) with a size of  $2.5 \times 2.5 \text{ cm}^2$ . The composite catalyst loading was achieved to be  $3 \text{ mg cm}^{-2}$ . Electrochemical tests were carried out in a flow cell (Scheme S2), the electrolyte was 0.5 M  $\text{KHCO}_3$  (pH 7.2), and the flow rate was 20 sccm by peristaltic pumps. During chronopotentiometry tests, high-purity  $\text{CO}_2$  gas was delivered into the cathodic compartment at a flow rate of 20 sccm. The gas products were analyzed by gas chromatograph (Shimadzu GC2030) and the Faradaic efficiency was calculated as follows:

$$FE (\%) = \frac{C \times 10^{-6} \times V \times 10^{-3} \times F \times n}{22.4 \times I \times t}$$

Where  $C$  (ppm) is the product concentration,  $V$  is the flow rate of  $\text{CO}_2$  ( $20 \text{ mL min}^{-1}$ ),  $F$  is the Faraday constant ( $96485 \text{ C mol}^{-1}$ ),  $n$  (=2) is the number of electrons required to form a molecule of CO or  $\text{H}_2$ , and  $I$  (A) is the current. In this experiment, since the reaction area is  $1 \text{ cm}^2$ ,  $I$  is numerically equal to the current density of the reaction.  $t$  (=60 s) is the time.

The CO mass activity ( $\text{mA mg}^{-1}$ ) is calculated by the following equation:

$$j_{\text{CO}}^m = \frac{j \times FE_{\text{CO}}}{w}$$

where  $j$  ( $\text{mA cm}^{-2}$ ) is the current density measured by potentiostatic testing,  $FE_{\text{CO}}$  is the CO Faradaic efficiency, and  $w$  ( $\text{mg cm}^{-2}$ ) is the catalyst metal loading measured by thermogravimetry.

---

TOF is calculated as the following:

$$TOF = \frac{TOF_0}{f} = \frac{j_{tot} \times FE_{CO}}{2F \times n_{tot} \times f}$$

Where  $j_{tot}$  is the total reduction current,  $FE_{CO}$  is CO Faradic efficiency,  $F$  is the Faraday constant (96485 C mol<sup>-1</sup>).  $n_{tot}$  is the total amount of Co on the working electrode.

$f$  is the surface fraction of electrochemically active Co sites and calculated as following:

$$f = \frac{n}{n_{tot}} = \frac{M \int UI}{mwvF}$$

Where  $n$  is the amount of surface active Co on the working electrode,  $M$  is the atomic weight of Co (58.93 g/mol),  $U$  is Co<sup>II</sup>/Co<sup>I</sup> redox region potential (V),  $I$  is Co<sup>II</sup>/Co<sup>I</sup> redox region current (mA),  $m$  is the mass of the electrocatalyst loaded on the working electrode,  $w$  is the weight fraction of Co in the electrocatalyst determined from the thermogravimetry.  $v$  is Co<sup>II</sup>/Co<sup>I</sup> redox region scanning rate (V/s).

$\sigma_H$  is calculated as the following:

$$\sigma_H = \frac{t}{RS}$$

Where  $\sigma_H$ ,  $t$ ,  $R$ ,  $S$  represent proton conductivity (S cm<sup>-1</sup>), thickness of catalysts (cm), resistance ( $\Omega$ ) and contact area (cm<sup>2</sup>).

the activation energy is calculated as the following:

$$\ln(\sigma_H T) = \ln A - \frac{E_a}{K_B T}$$

Where  $T$ ,  $E_a$ ,  $k_B$ ,  $A$  represent temperature (K), activation energy (eV), Boltzmann's constant (1.38 × 10<sup>-23</sup> J K<sup>-1</sup>) and preexponential factor.

---

**Results and discussion**

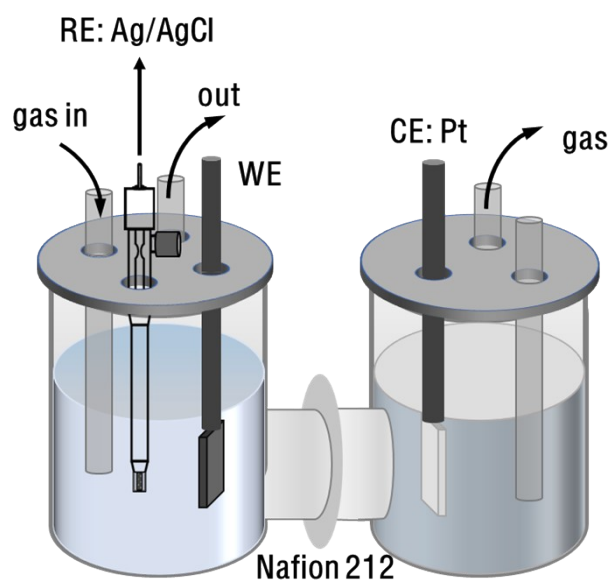

**Scheme S1.** Illustration of the H-cell.

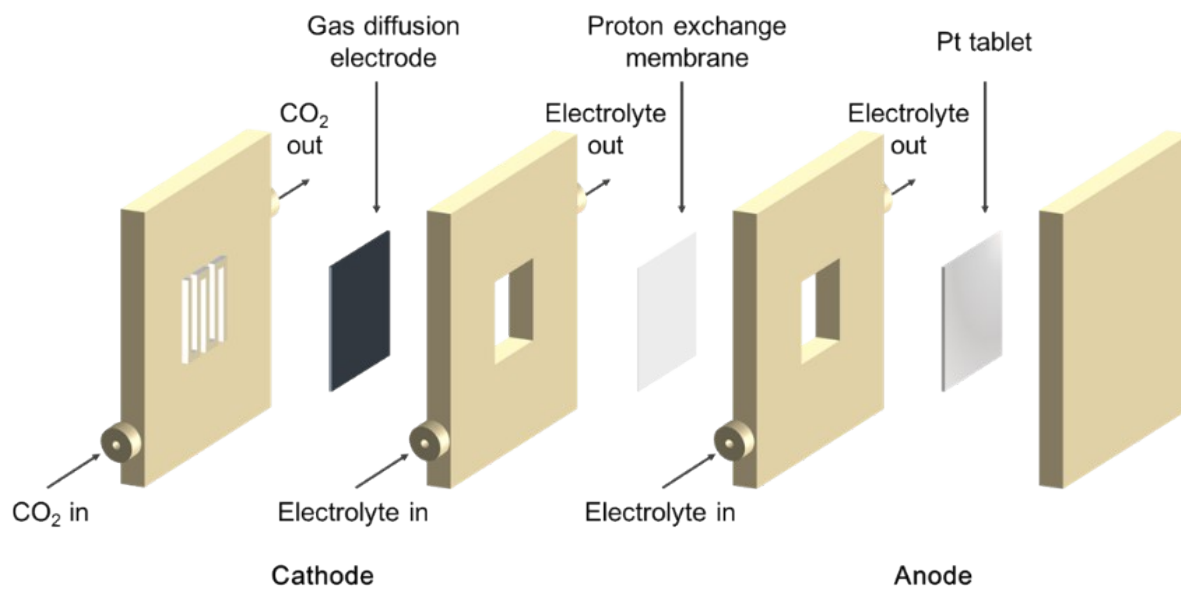

**Scheme S2.** Illustration of the flow cell.



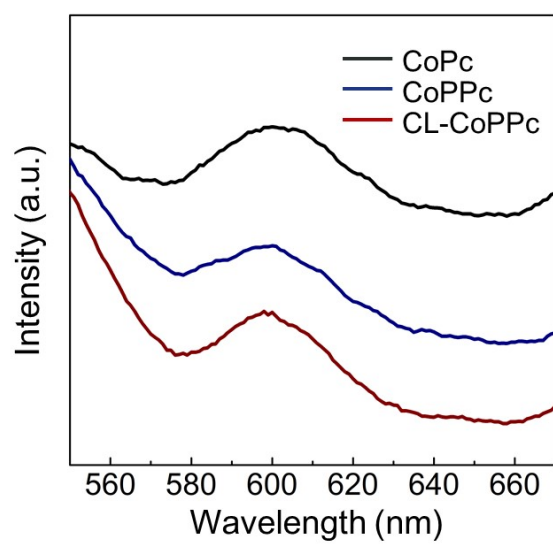

**Figure S1.** Fluorescence spectra of CoPc, CoPPc and CL-CoPPc.

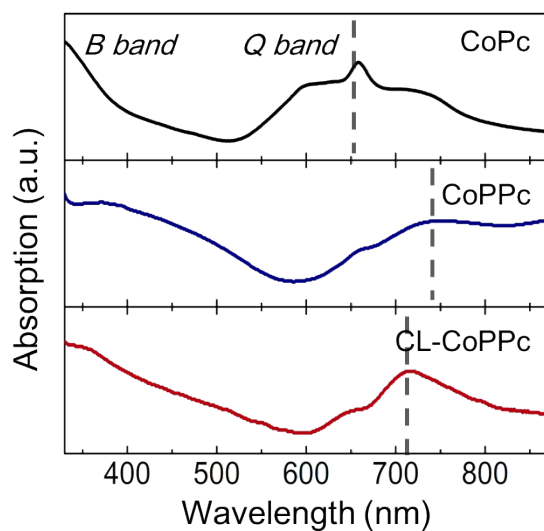

**Figure S2.** Ultraviolet-visible spectra of CoPc, CoPPc and CL-CoPPc.

In ultraviolet-visible spectra, two characteristic absorbance bands of phthalocyanine were observed at 550-800 nm (*Q* band) and 300-450 nm (*B* band) as the results of  $a_{1u}(\pi)-e_g(\pi^*)$  and  $a_{2u}(\pi)-e_g(\pi^*)$  transition from the highest occupied molecular orbital (HOMO) to the lowest unoccupied molecular orbital (LUMO), respectively.<sup>[1]</sup>

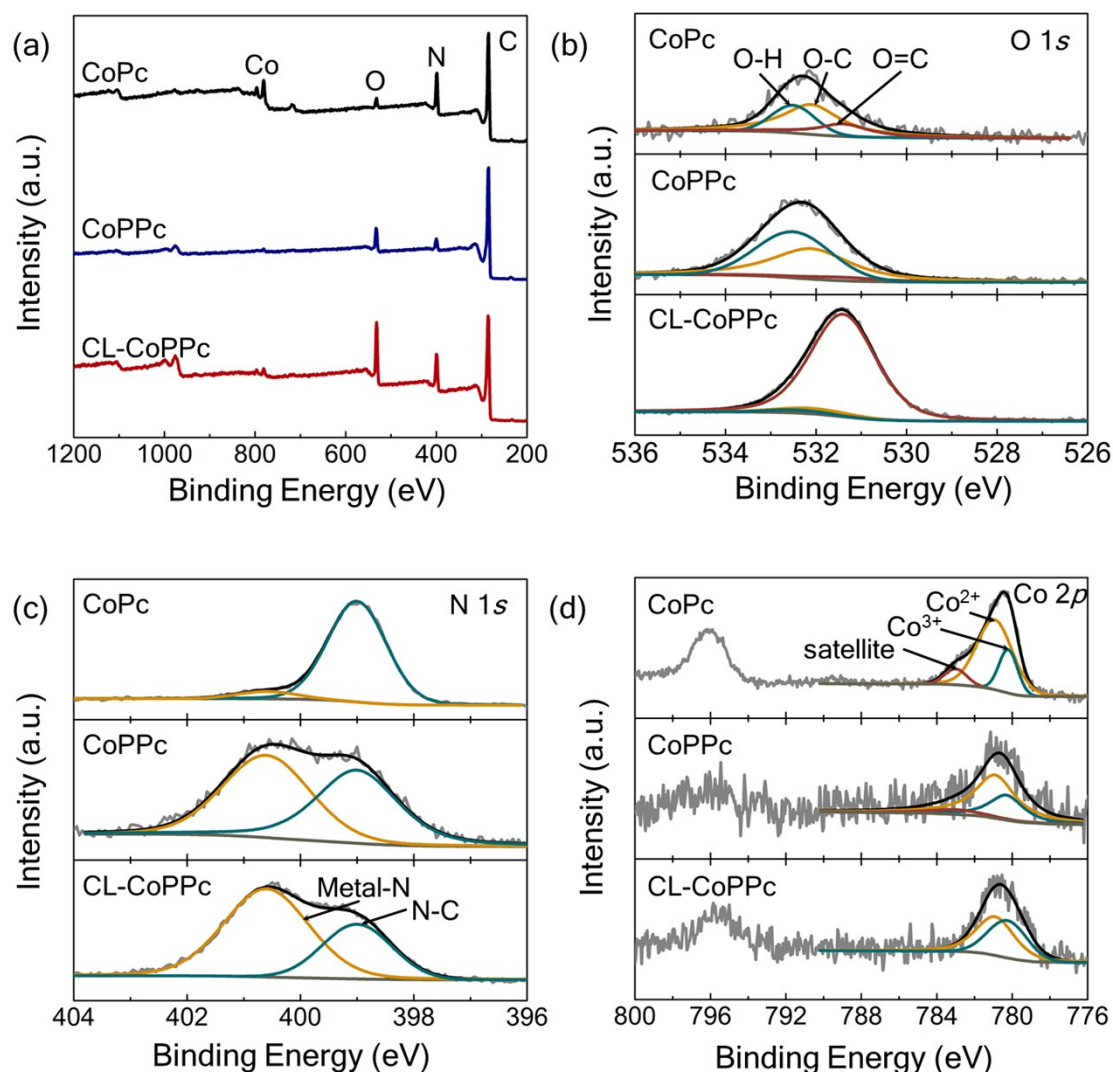

**Figure S3.** a) The XPS survey spectra of CoPc, CoPPc and CL-CoPPc. The high-resolution XPS spectra of b) O 1s, c) N 1s, d) Co 2p, for CoPc, CoPPc and CL-CoPPc.

The high-resolution spectra of Co 2p for all materials could be deconvoluted into Co<sup>3+</sup> (780.2 eV), Co<sup>2+</sup> (780.9 eV), and satellite (783.0 eV). The N 1s binding energy at 400.6 eV is related to four central nitrogen atoms located in red dash circle, noted as Metal-N. Another N 1s position at 399.0 eV corresponds to other four aza-bridging nitrogen atoms located in green dash circle, noted as N-C. The XPS spectrum of N 1s for CL-CoPPc was similar to CoPPc, indicating CL-CoPPc also had phthalocyanine-based conjugated polymer network structure. The pass energy is 200 eV for survey, and 30 eV for high resolution scans, the same below.

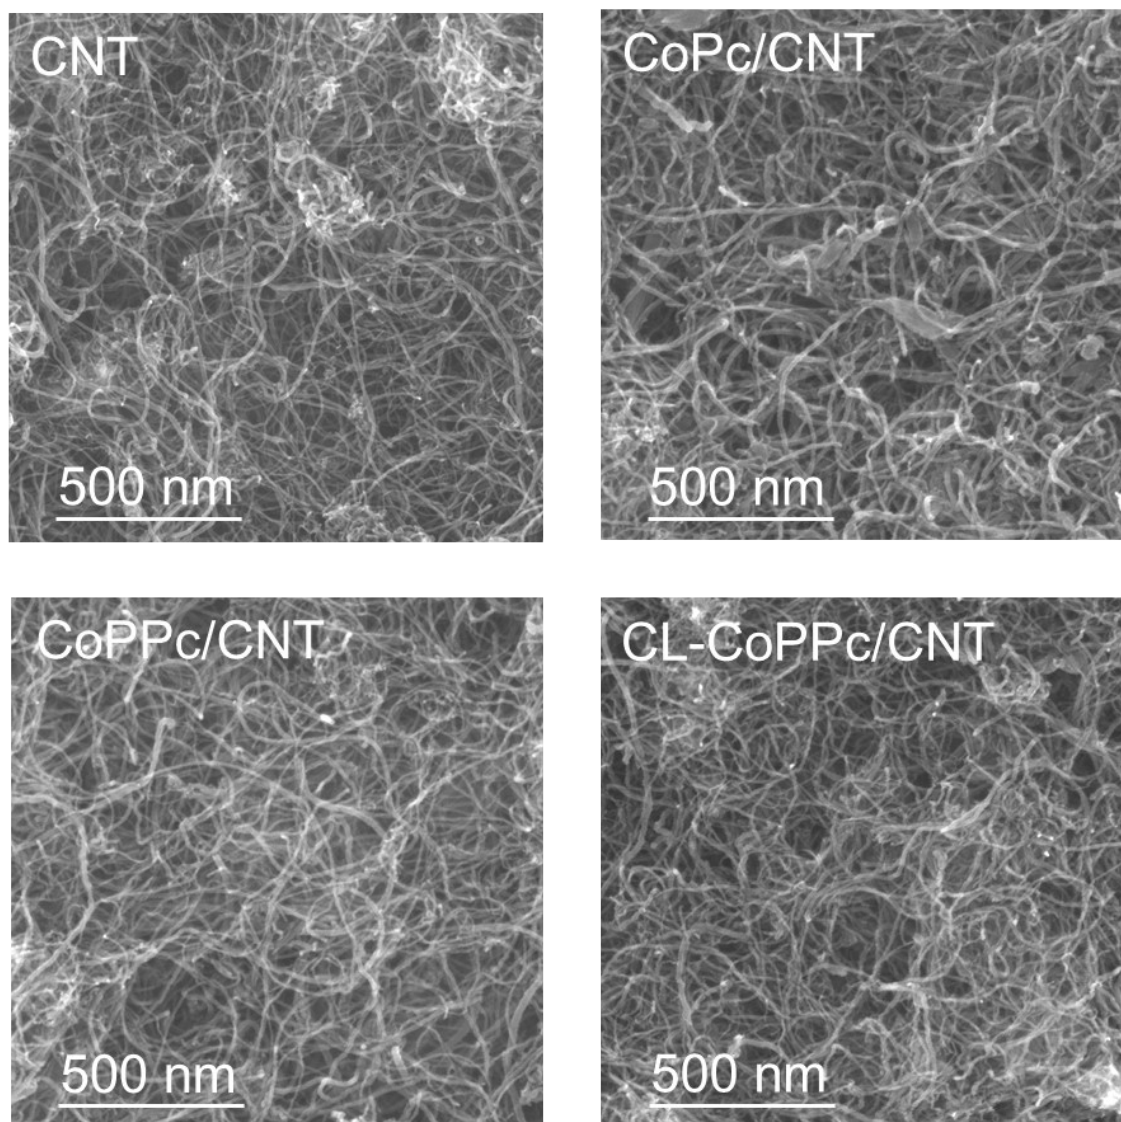

**Figure S4.** SEM images of carbon nanotubes (CNT), carbon nanotubes supported CoPc (CoPc/CNT), CoPPc (CoPPc/CNT), and CL-CoPPc (CL-CoPPc/CNT).

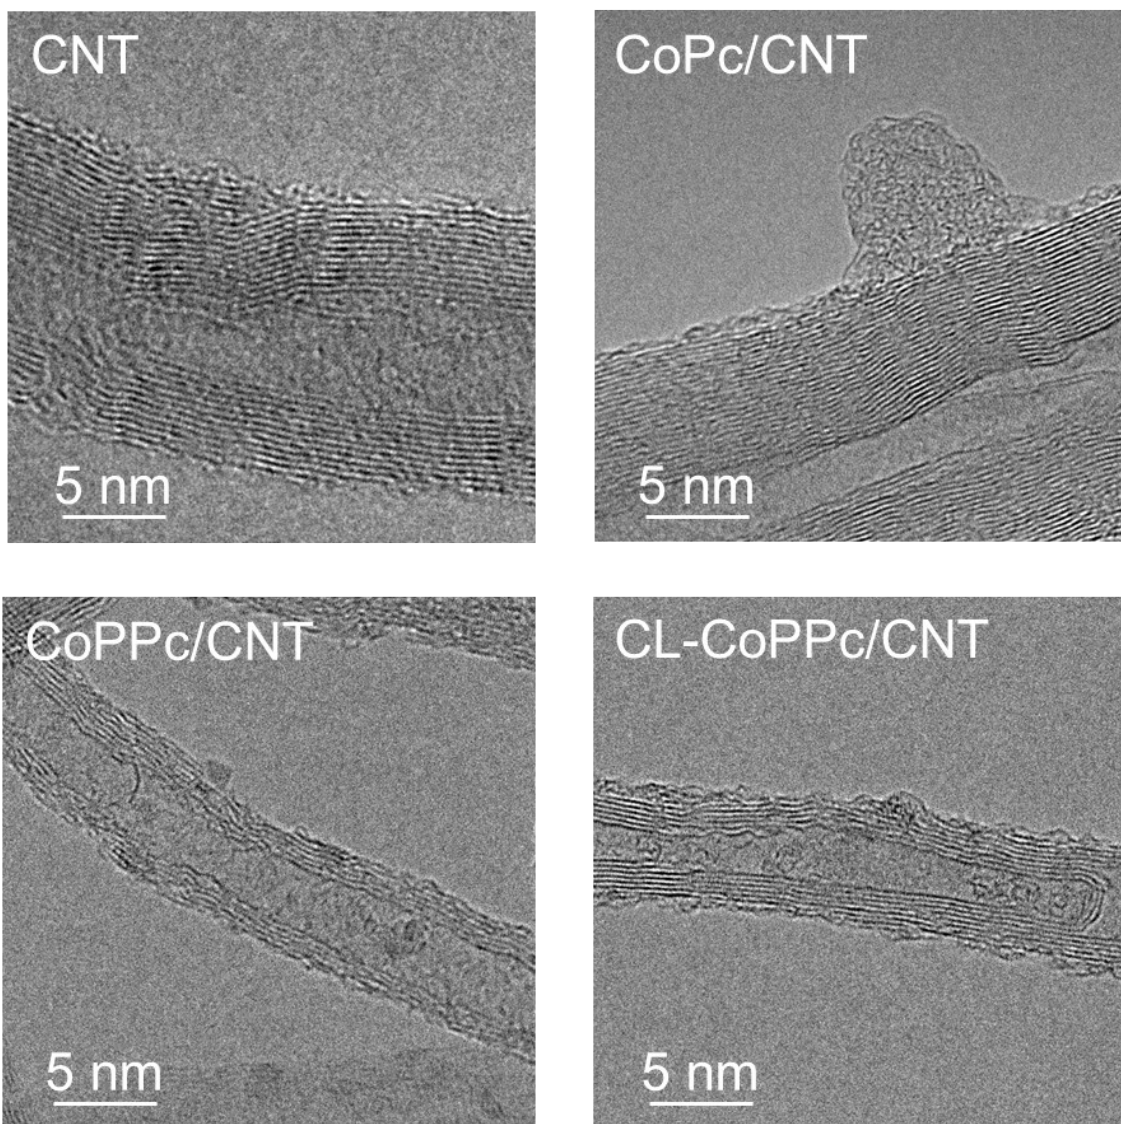

**Figure S5.** TEM images of CNT, CoPc/CNT, CoPPc/CNT and CL-CoPPc/CNT.

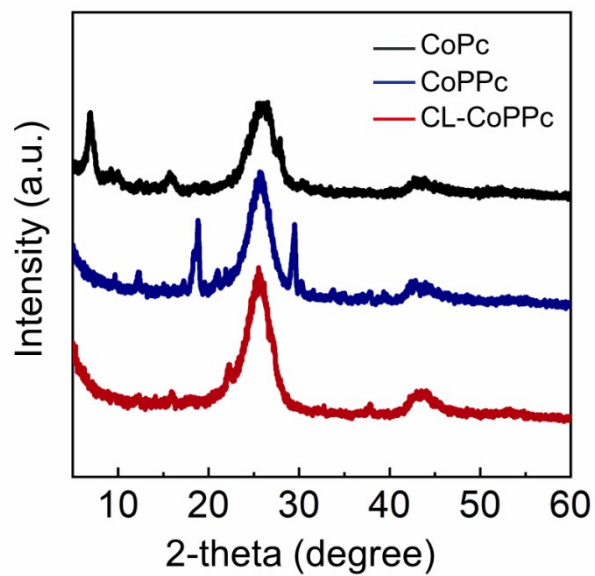

**Figure S6.** XRD patterns of CoPc, CoPPc and CL-CoPPc.

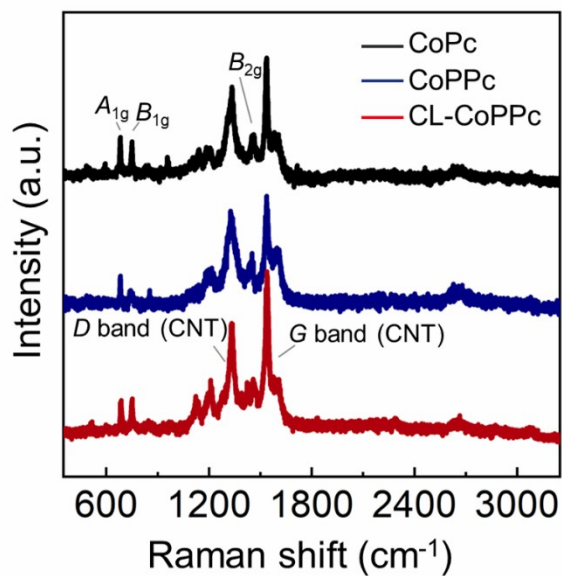

**Figure S7.** Raman spectra of CoPc, CoPPc and CL-CoPPc.

After the heterogenization with nanocarbons, Raman spectra show the apparent characteristic peaks corresponding to phthalocyanines macrocycles in the CL-CoPPc, CoPPc and CoPc samples. However, CL-CoPPc did not exhibit crystallization peaks in XRD patterns (Figure S6), which was different from CoPPc and CoPc. It indicated that the carbonyl linkages could reduce the  $\pi$ - $\pi$  stacking induced crystallization.

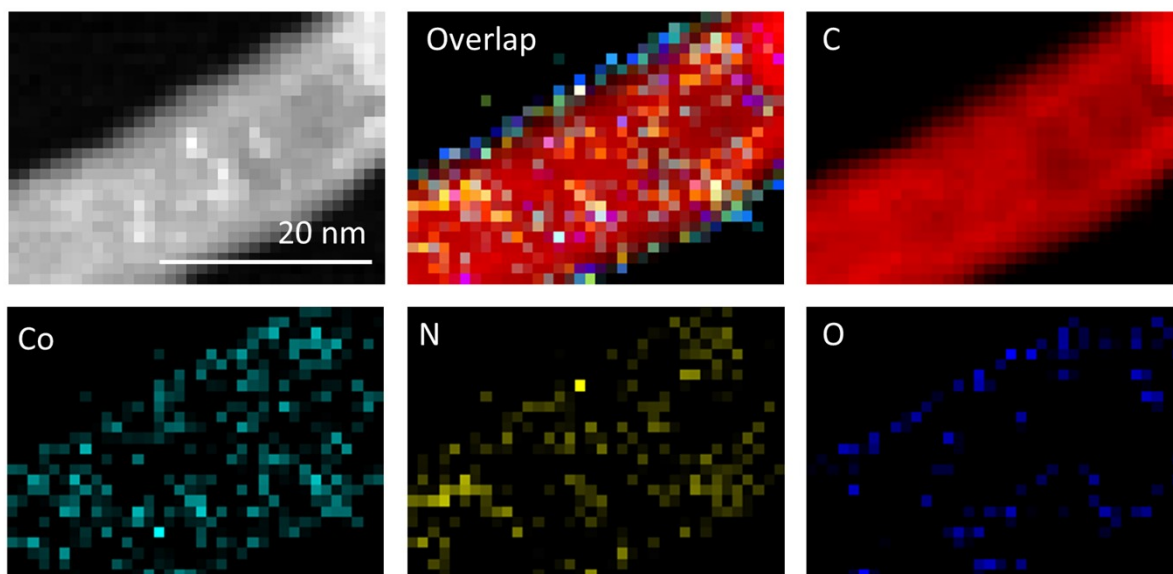

**Figure S8.** STEM-EELS elemental mapping images of CNT supported CL-CoPPc



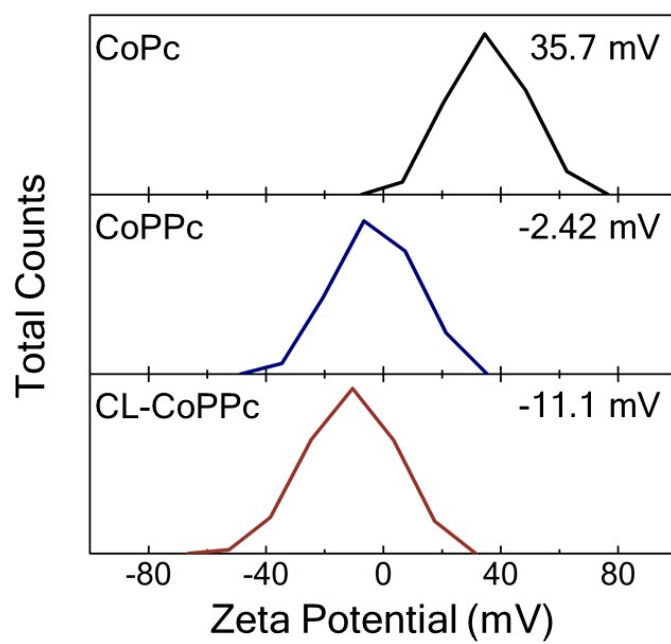

**Figure S9.** Zeta-potentials of CNT supported CoPc, CoPPc, and CL-CoPPc.

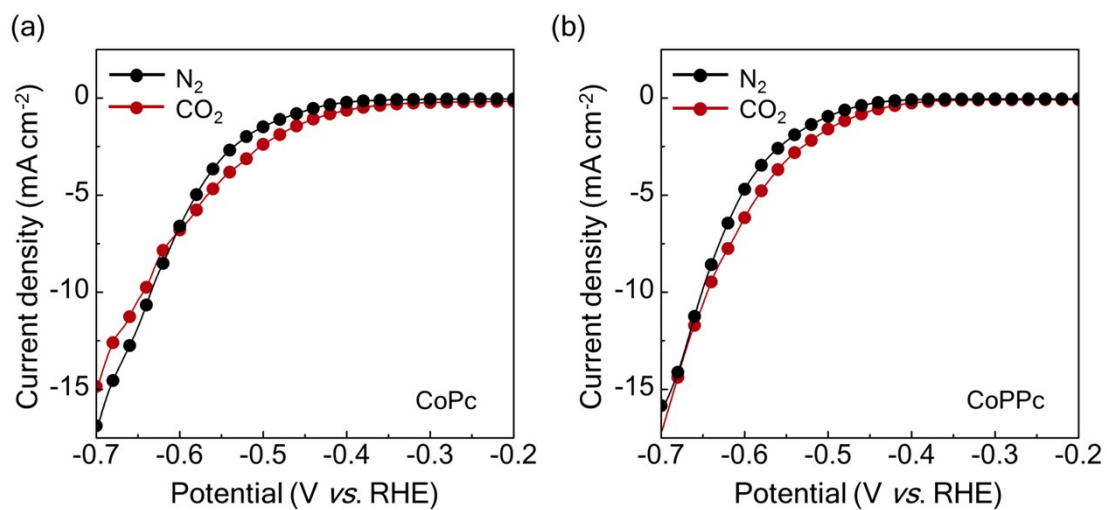

**Figure S10.** The LSV curves of a) CoPc/CNT and b) CoPPc/CNT on glassy carbon electrode.

The scan rate is 10 mV/s, the same below.

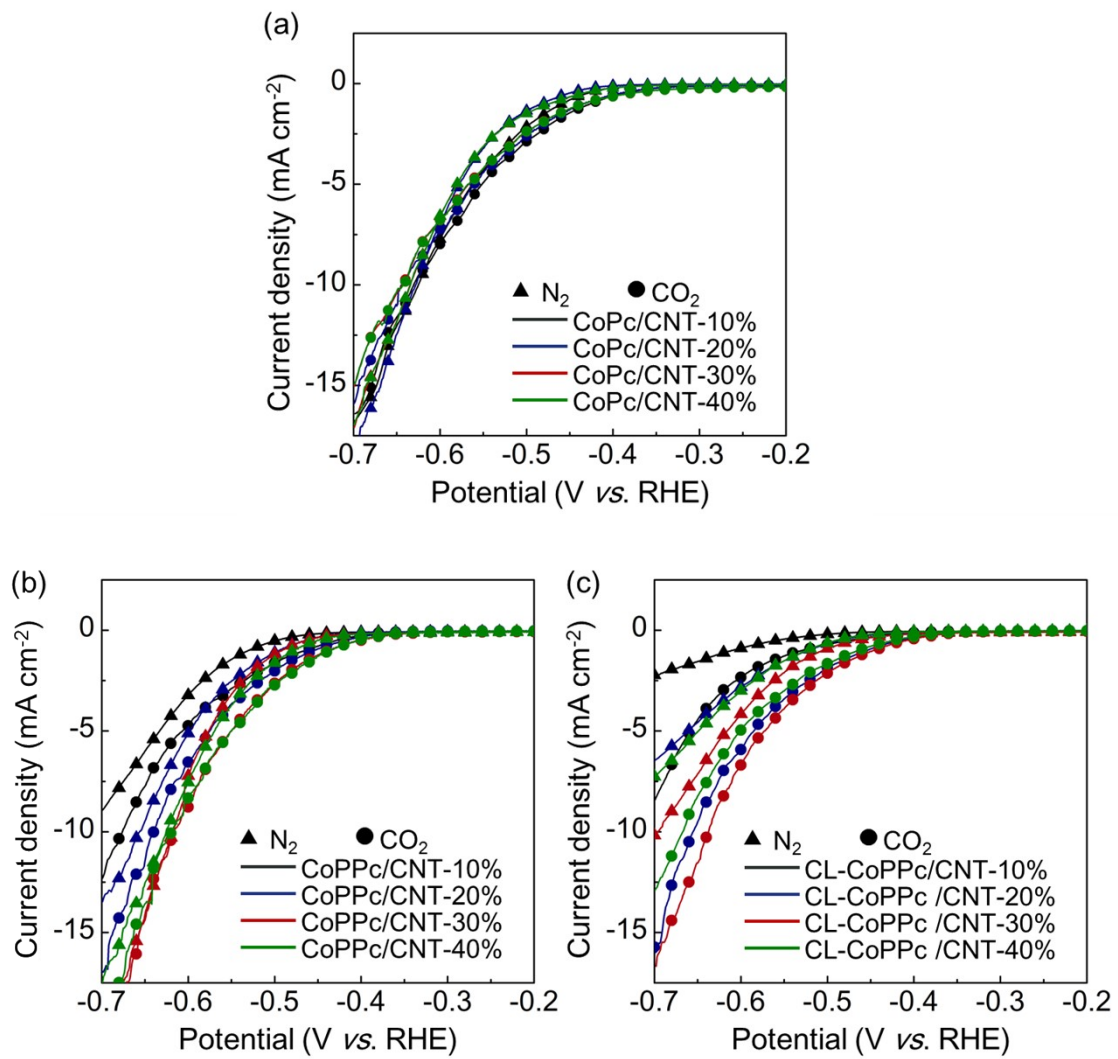

**Figure S11.** LSV curves of a) CoPc/CNT, b) CoPPc/CNT and c) CL-CoPPc/CNT with different contents on glassy carbon electrode.

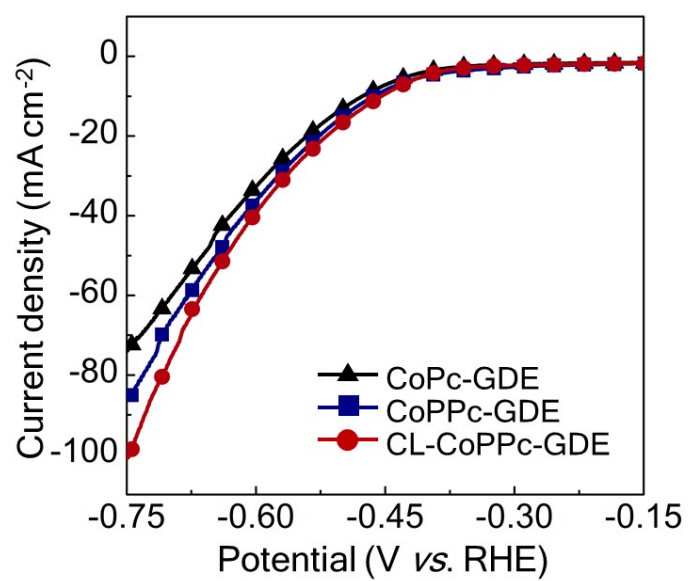

**Figure S12.** LSV curves of CoPc, CoPPc and CL-CoPPc on gas diffusion electrode.

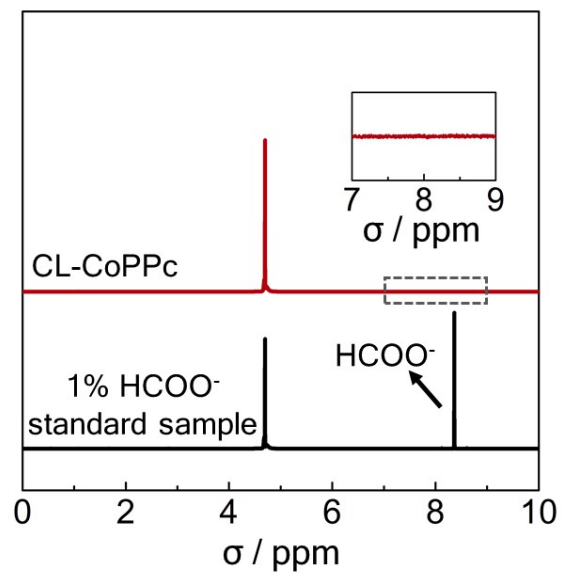

**Figure S13.**  $^1\text{H-NMR}$  of liquid product from CL-CoPPc and the standard  $\text{HCOO}^-$  sample.

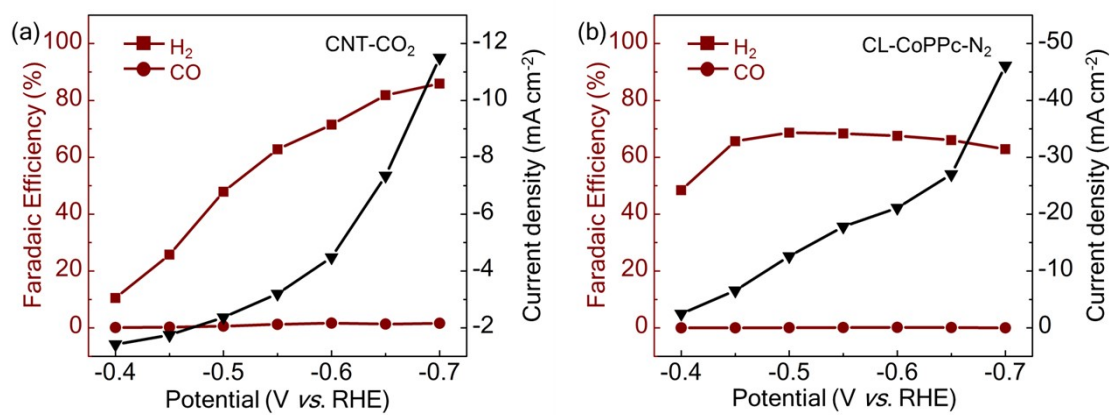

**Figure S14.** ECR performance of (a) CNTs in CO<sub>2</sub> atmosphere and (b) CL-CoPPc in N<sub>2</sub> atmosphere.

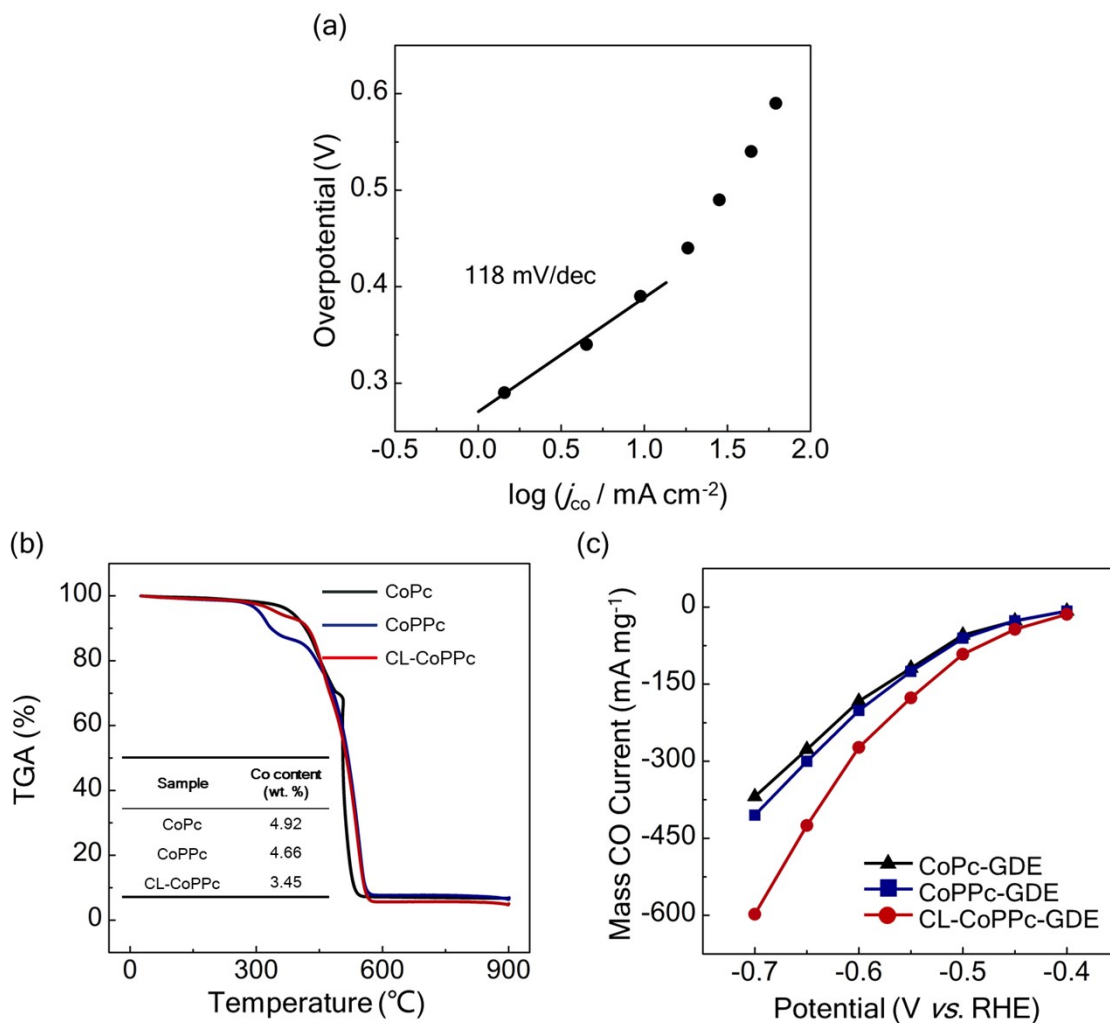

**Figure S15.** (a) Tafel slope of CL-CoPPc modified GDE. (b) Thermogravimetric analysis (TGA) of CNT supported CoPc, CoPPc, and CL-CoPPc. Inset: the metal Co content derived from TGA results. (c) Mass CO Current of CoPc, CoPPc, and CL-CoPPc modified GDEs derived from TGA results.

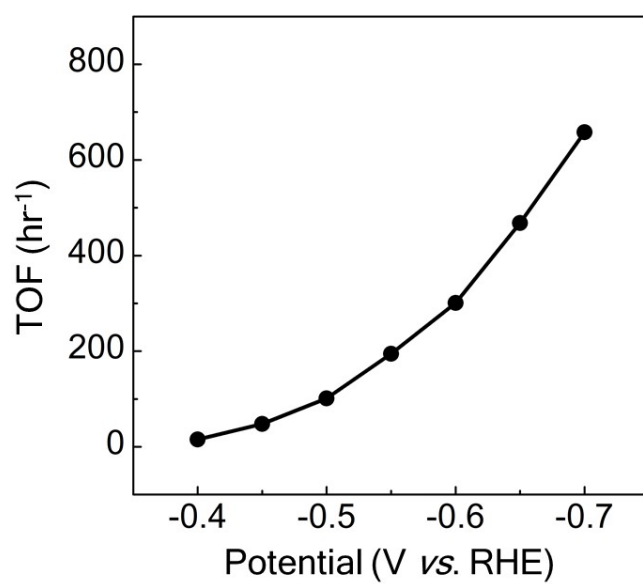

**Figure S16.** TOF of the CL-CoPPc (assumed all the atomic cobalt sites participate in the ECR process).



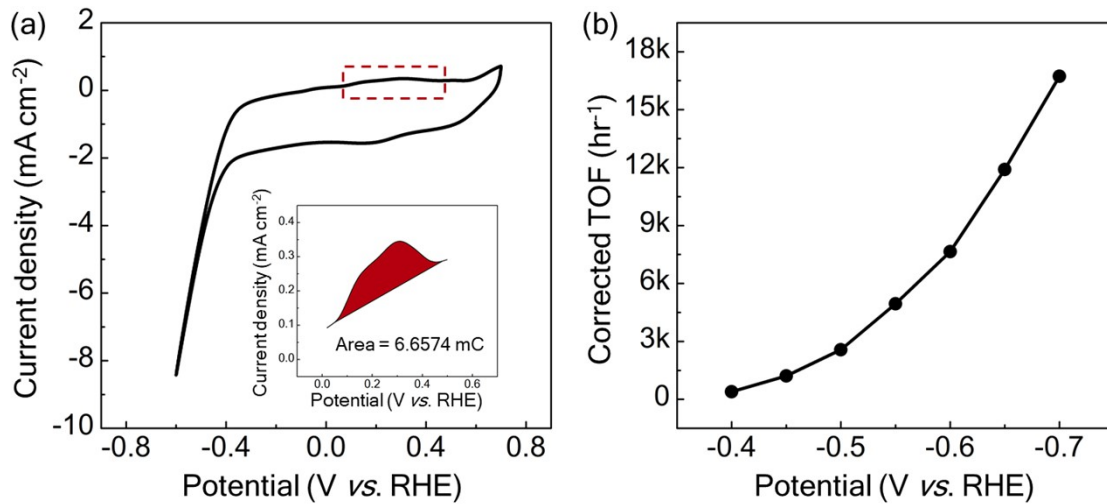

**Figure S17.** (a) CV curve of the CL-CoPPc/CNT in N<sub>2</sub>-saturated 0.5 M KHCO<sub>3</sub> (pH = 8.4). Inset shows the total charge integrated from the Co<sup>I</sup>/Co<sup>II</sup> anodic wave. (b) TOF of the CL-CoPPc/CNT (assumed all the atomic cobalt sites participate in the ECR process).

We integrated the anodic wave in the CV curve of CL-CoPPc/CNT and then calculated the amount of surface-active Co by assuming a one-electron redox process:

$$n_{act} = \frac{Q}{F} = \frac{6.6574 \times 10^{-3} \text{ C}}{96485 \text{ C/mol}} = 6.90 \times 10^{-8} \text{ mol}$$

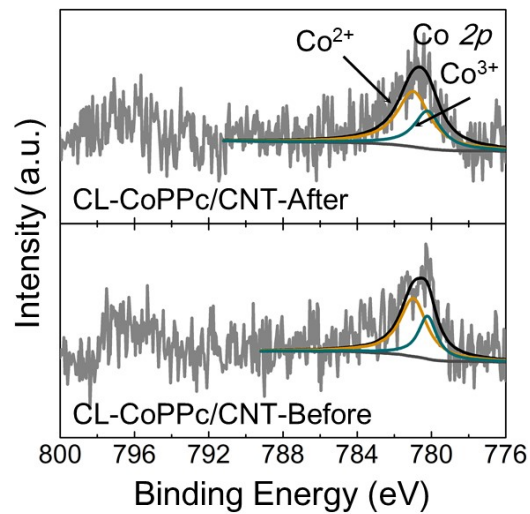

**Figure S18.** The high-resolution XPS spectra of Co 2p for CL-CoPPc/CNT before (bottom) and after (top) reaction.

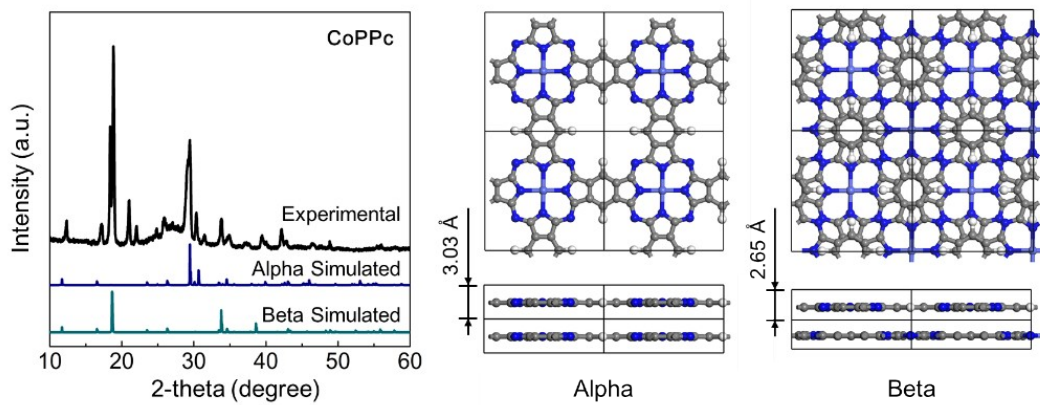

**Figure S19.** XRD patterns and simulation results of CoPPc.

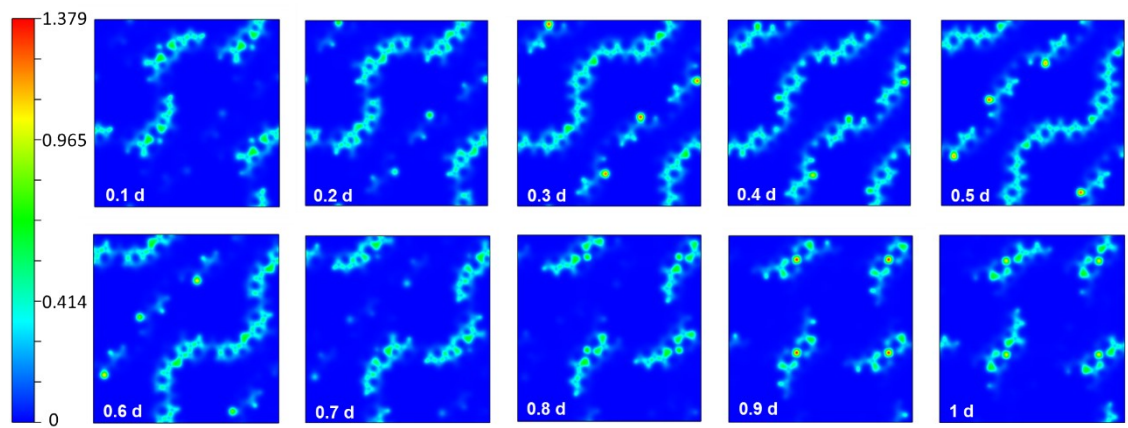

**Figur**

**e S20.** Electron localization functions of CL-CoPPc

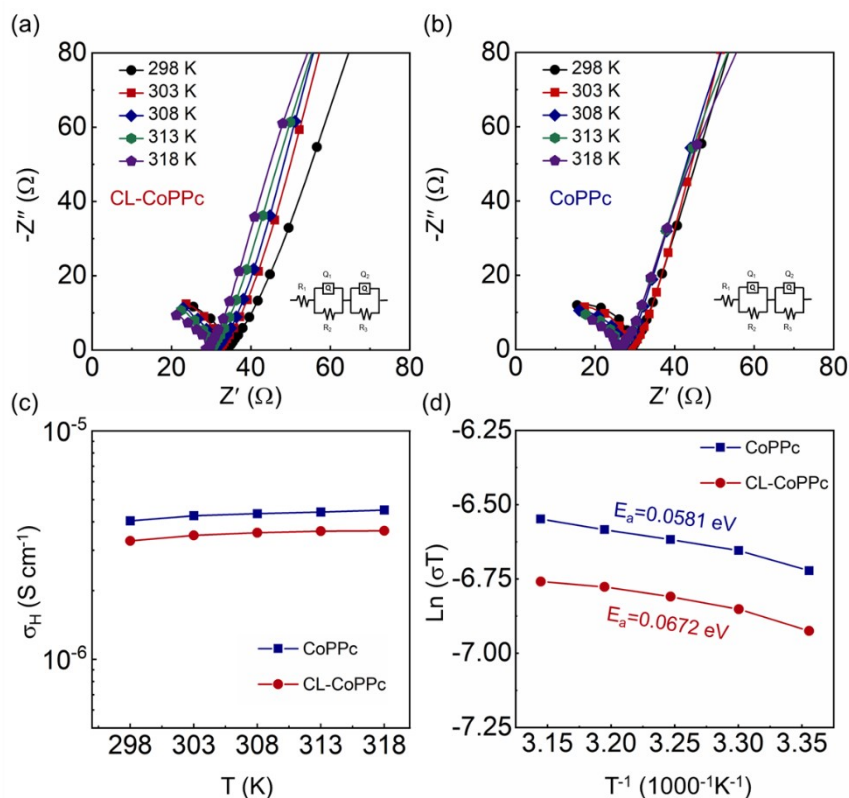

**Figure. S21** Electrochemical impedance spectra of a) CL-CoPPc, b) CoPPc. c) Proton conductivity of CL-CoPPc and CoPPc at different temperatures. d) Energy barrier of CL-CoPPc and CoPPc.

We conducted electrochemical impedance spectra to measure the rate of proton transfer, and the calculated proton transfer rate of CL-CoPPc and CoPPc were  $3.30 \times 10^{-6}$  and  $4.04 \times 10^{-6}$  S  $\text{cm}^{-1}$  at 25 °C, respectively. According to the Arrhenius behavior related to proton conductivity at different temperatures, it was found that CL-CoPPc showed a higher energy barrier (0.067 eV) than that of CoPPc (0.058 eV), which also indicated the rate of proton transfer on CL-CoPPc was slower than CoPPc.

**Table S1.** The Co-, O-, N- and C-content of CoPc, CoPPc and CL-CoPPc. The capacitance of two Co moieties, two N moieties and three O moieties of the above three samples.

| Sample   | Surface chemistry (XPS)          |         |          |         |
|----------|----------------------------------|---------|----------|---------|
|          | Co (at%)                         | O (at%) | N (at%)  | C (at%) |
| CoPc     | 2.56                             | 1.93    | 39.22    | 56.29   |
| CoPPc    | 0.41                             | 4.84    | 8.79     | 85.96   |
| CL-CoPPc | 0.73                             | 18.14   | 10.95    | 70.17   |
| Sample   | Functionality (% of total Co 2p) |         |          |         |
|          | Co (II)                          |         | Co (III) |         |
| CoPc     | 69.6                             |         | 21.1     |         |
| CoPPc    | 62.7                             |         | 28.2     |         |
| CL-CoPPc | 55.6                             |         | 44.4     |         |
| Sample   | Functionality (% of total N 1s)  |         |          |         |
|          | Metal-N                          |         | N-C      |         |
| CoPc     | 6.8                              |         | 93.2     |         |
| CoPPc    | 52.0                             |         | 48.0     |         |
| CL-CoPPc | 67.9                             |         | 32.1     |         |
| Sample   | Functionality (% of total O 1s)  |         |          |         |
|          | O-H                              | O-C     | O=C      |         |
| CoPc     | 25.4                             | 54.3    | 20.3     |         |
| CoPPc    | 47.6                             | 46.5    | 5.9      |         |
| CL-CoPPc | 2.1                              | 4.8     | 93.1     |         |

---

**Table S2** Electrical conductivity of CL-CoPPc, CoPPc and CoPc

---

|                   | <b>Conductivity (S cm<sup>-1</sup>)</b> |
|-------------------|-----------------------------------------|
| CL-CoPPc          | $7.07 \times 10^{-6}$                   |
| CoPPc             | $7.19 \times 10^{-5}$                   |
| CoPc              | $2.84 \times 10^{-7}$                   |
| CL-CoPPc with CNT | 21.28                                   |
| CoPPc with CNT    | 23.56                                   |
| CoPc with CNT     | 25.54                                   |

---

**Table S3.** Summary of the CO<sub>2</sub>RR performances on representative high-performance electrocatalysts under diverse conditions.

| Catalyst              | Electrolyte              | Current Density                               | Faradaic Efficiency         | TOF                                         | Ref.      |
|-----------------------|--------------------------|-----------------------------------------------|-----------------------------|---------------------------------------------|-----------|
| CL-CoPPc/CNT          | 0.5 M KHCO <sub>3</sub>  | 50 mA cm <sup>-2</sup><br>@ $\eta = 540$ mV   | 90%<br>@ $\eta = 540$ mV    | 11898 hr <sup>-1</sup><br>@ $\eta = 0.54$ V | This work |
| CoPPc/CNT             | 0.5 M KHCO <sub>3</sub>  | 18.7 mA cm <sup>-2</sup><br>@ $\eta = 0.5$ V  | >80%<br>@ $\eta = 0.34$ V   | >4800 h <sup>-1</sup><br>@ $\eta = 0.5$ V   | [2]       |
| D-P-CoPc              | 0.5 M KHCO <sub>3</sub>  | 2.45 mA cm <sup>-2</sup><br>@ $\eta = 0.49$ V | ~ 97 %<br>@ $\eta = 0.49$ V | 412 h <sup>-1</sup><br>@ $\eta = 0.49$ V    | [3]       |
| CoPc-2H2Por COF       | 0.5 M KHCO <sub>3</sub>  | 8.1 mA cm <sup>-2</sup><br>@ $\eta = 0.44$ V  | 95 %<br>@ $\eta = 0.44$ V   | ~320 h <sup>-1</sup><br>@ $\eta = 0.44$ V   | [4]       |
| Fe <sup>3+</sup> -N-C | 0.5 M KHCO <sub>3</sub>  | ~50 mA cm <sup>-2</sup><br>@ $\eta = 0.3$ V   | ~90%<br>@ $\eta = 0.3$ V    | N.A.                                        | [5]       |
| Sn/Cu-PVDF            | 0.1 M KHCO <sub>3</sub>  | ~100 mA cm <sup>-2</sup><br>@ $\eta = 1.09$ V | ~80%<br>@ $\eta = 1.09$ V   | N.A.                                        | [6]       |
| V-CuInSe2             | 0.5 M KHCO <sub>3</sub>  | 112 mA cm <sup>-2</sup><br>@ $\eta = 0.59$ V  | 91%<br>@ $\eta = 0.59$ V    | N.A.                                        | [7]       |
| NiPc-OMe-MDE          | 1 M KHCO <sub>3</sub>    | 150 mA cm <sup>-2</sup><br>@ $\eta = 0.5$ V   | 99.6%<br>@ $\eta = 0.5$ V   | 12 s <sup>-1</sup><br>@ $\eta = 0.5$ V      | [8]       |
| CoPc-CN/CNT           | 0.1 M KHCO <sub>3</sub>  | 15 mA cm <sup>-2</sup><br>@ $\eta = 0.52$ V   | 98%<br>@ $\eta = 0.52$ V    | 4.1 s <sup>-1</sup><br>@ $\eta = 0.52$ V    | [9]       |
| CoPc2/CNT             | 0.5 M NaHCO <sub>3</sub> | 70.5 mA cm <sup>-2</sup><br>@ $\eta = 0.54$ V | 94%<br>@ $\eta = 0.54$ V    | 1.67 s <sup>-1</sup><br>@ $\eta = 0.54$ V   | [10]      |
| MOF-1992              | 0.1 M KHCO <sub>3</sub>  | 16.5 mA cm <sup>-2</sup><br>@ $\eta = 0.52$ V | 80%<br>@ $\eta = 0.52$ V    | 720 h <sup>-1</sup><br>@ $\eta = 0.52$ V    | [11]      |
| CuPPc@CNT             | 0.1M CsHCO <sub>3</sub>  | 6.9 mA cm <sup>-2</sup><br>@ $\eta = 0.59$ V  | 80%<br>@ $\eta = 0.59$ V    | N.A.                                        | [12]      |
| D-CoPPc-CNT           | 0.5 M NaHCO <sub>3</sub> | 8 mA cm <sup>-2</sup><br>@ $\eta = 0.59$ V    | 97%<br>@ $\eta = 0.59$ V    | 1400 h <sup>-1</sup><br>@ $\eta = 0.49$ V   | [13]      |



---

## References

- [1] O. Bertha, S. M. Park and N. Doddapaneni, *Journal of the Electrochemical Society*, 1996, **143**, 1800-1805.
- [2] N. Han, Y. Wang, L. Ma, J. G. Wen, J. Li, H. C. Zheng, K. Q. Nie, X. X. Wang, F. P. Zhao, Y. F. Li, J. Fan, J. Zhong, T. P. Wu, D. J. Miller, J. Lu, S. T. Lee and Y. G. Li, *Chem*, 2017, **3**, 652-664.
- [3] H. H. Wu, M. Zeng, X. Zhu, C. C. Tian, B. B. Mei, Y. Song, X. L. Du, Z. Jiang, L. He, C. G. Xia and S. Dai, *Chemelectrochem*, 2018, **5**, 2717-2721.
- [4] J. J. Yuan, S. T. Chen, Y. Y. Zhang, R. J. Li, J. Zhang and T. Y. Peng, *Advanced Materials*, 2022, **34**, 2203139.
- [5] J. Gu, C. S. Hsu, L. C. Bai, H. M. Chen and X. L. Hu, *Science*, 2019, **364**, 1091-1094.
- [6] W. B. Ju, F. Z. Jiang, H. Ma, Z. Y. Pan, Y. B. Zhao, F. Pagani, D. Rentsch, J. Wang and C. Battaglia, *Advanced Energy Materials*, 2019, **9**, 1901514
- [7] J. J. Wang, X. R. Zheng, G. J. Wang, Y. H. Cao, W. L. Ding, J. F. Zhang, H. Wu, J. Ding, H. L. Hu, X. P. Han, T. Y. Ma, Y. D. Deng and W. N. Hu, *Advanced Materials*, 2022, **34**, 2106354.
- [8] X. Zhang, Y. Wang, M. Gu, M. Y. Wang, Z. S. Zhang, W. Y. Pan, Z. Jiang, H. Z. Zheng, M. Lucero, H. L. Wang, G. E. Sterbinsky, Q. Ma, Y. G. Wang, Z. X. Feng, J. Li, H. J. Dai and Y. Y. Liang, *Nature Energy*, 2020, **5**, 684-692.
- [9] X. Zhang, Z. S. Wu, X. Zhang, L. W. Li, Y. Y. Li, H. M. Xu, X. X. Li, X. L. Yu, Z. S. Zhang, Y. Y. Liang and H. L. Wang, *Nature Communications*, 2017, **8**, 14657.
- [10] M. Wang, K. Torbensen, D. Salvatore, S. X. Ren, D. Joulié, F. Dumoulin, D. Mendoza, B. Lassalle-Kaiser, U. Isci, C. P. Berlinguette and M. Robert, *Nature Communications*, 2019, **10**, 1-8.
- [11] R. Matheu, E. Gutierrez-Puebla, M. A. Monge, C. S. Diercks, J. Kang, M. S. Prévot, X. K. Pei, N. Hanikel, B. Zhang, P. D. Yang and O. M. Yaghi, *Journal of the American Chemical Society*, 2019, **141**, 17081-17085.
- [12] D. Karapinar, A. Zitolo, T. N. Huan, S. Zanna, D. Taverna, L. H. G. Tizei, D. Giaume, P. Marcus, V. Mougél and M. Fontecave, *Chemsuschem*, 2020, **13**, 173-179.

---

[13] J. C. Chen, J. Y. Li, W. L. Liu, X. H. Ma, J. Xu, M. H. Zhu and Y. F. Han, *Green Chemistry*, 2019, **21**, 6056-6061.
